# Supplementary material
Source: PubMed Central journal article supplement (PMC3632891)
Supplement: AAC.02335-12_zac999101802so5.pdf [file AAC.02335-12_zac999101802so5.pdf]

1 **Supplementary Material**

2  
3  
4 **Structure-based discovery of the novel antiviral properties**  
5  
6 **of naproxen against the nucleoprotein of Influenza A virus**

7 Nathalie Lejal<sup>1&</sup>, Bogdan Tarus<sup>1&</sup>, Edwige Bouguyon<sup>1</sup>, Sylvie Chenavas<sup>2</sup>, Nicolas Bertho<sup>1</sup>,  
8 Bernard Delmas<sup>1</sup>, Rob WH Ruigrok<sup>2</sup>, Carmelo Di Primo<sup>3</sup> and Anny Slama-Schwok<sup>1\*</sup>

9  
10  
11  
12  
13  
14  
15 **Supplementary Figures 1-6: pages 2-9**

16  
17  
18 **Supplementary Movie: naproxen\_movie.avi**

19 We visualize the movie with VLC media player [www.videolan.org](http://www.videolan.org)

20

1

### Supplementary Figure 1:

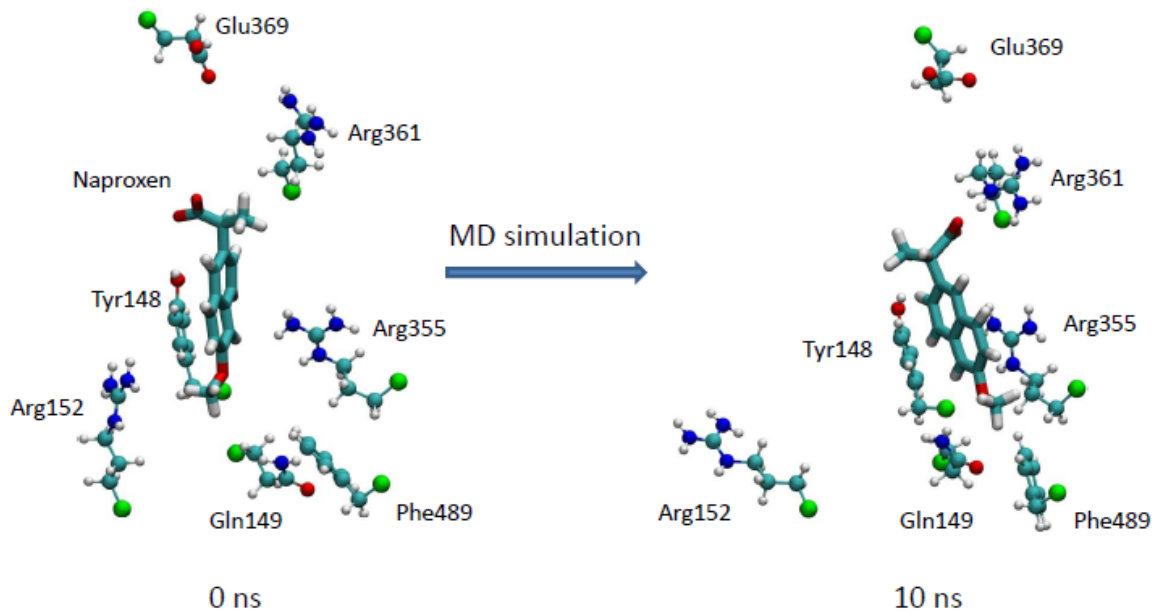

2

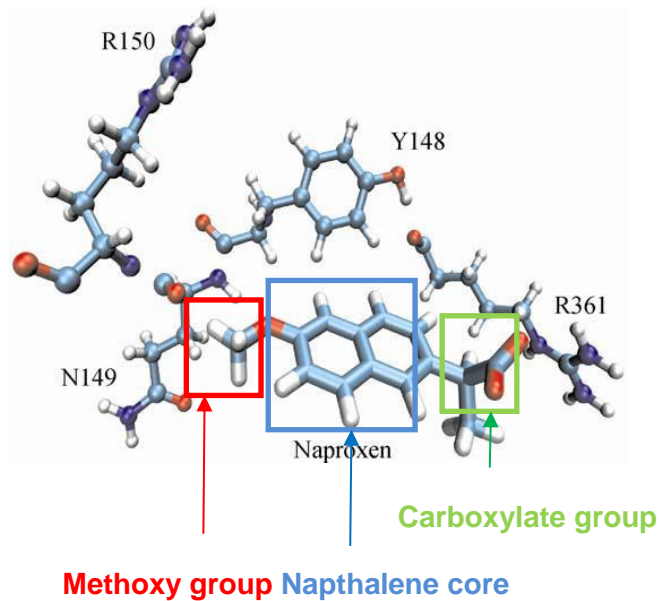

3

4

5

6

7 Close-up view of the interactions between naproxen and NP before (left) and after 10 ns (right)

8 molecular dynamics simulations. In the initial step, the naphthalene ring of naproxen stacks on

9 Tyr148, with weak interaction with its OH group while Arg361 forms a salt bridge with Gln369.

10 After 4.5 ns MD simulation, this salt bridge is disrupted, and the rotation of Arg361 enables

1 electrostatic interactions between the positively charged guanidinium group of Arg361 and the  
2 negatively charged carboxylate group of naproxen. This drove a reorientation of the naphthalene  
3 core and methoxy group toward Arg355, Phe489 and Gln149 and away from Arg152. A  
4 different angle is provided in the bottom view, with the dissection of the different chemical parts  
5 of naproxen. A dynamic view of the process can be seen in the attached movie.

6  
7  
8

1

### Supplementary Figure 2:

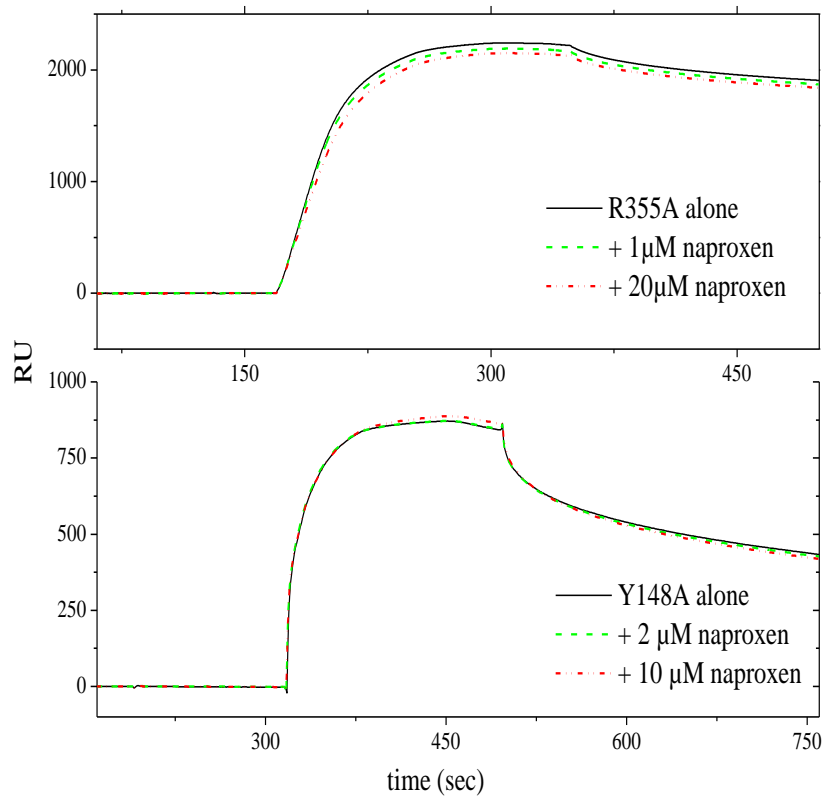

2

3 SPR data show the lack of interaction of naproxen with the mutated proteins Y148A and R355A:  
4 the signal of the protein- RNA complex (black curves) remains almost unchanged (R355A) or  
5 identical (Y148A) with or without naproxen added. This shows that naproxen is unable to  
6 compete with RNA binding to these mutated proteins, since the essential residues insuring  
7 naproxen binding to NP were mutated. This behavior was also seen with the mutant R361A  
8 (Figure 2B), in contrast with the competition observed with the wild-type NP (Figure 2A).

9

10

Supplementary Figure 3:

1  
2

**A**

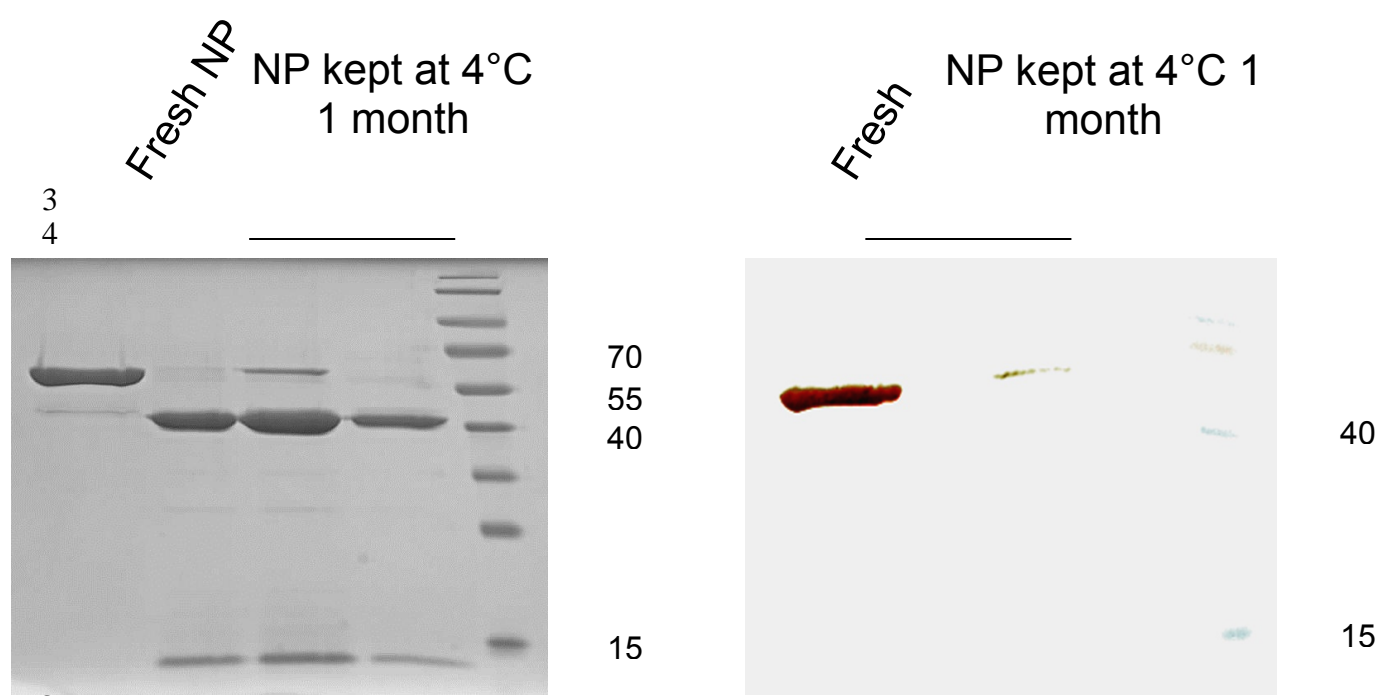

3  
4

1 week at ambient T°      1 week at 4°C

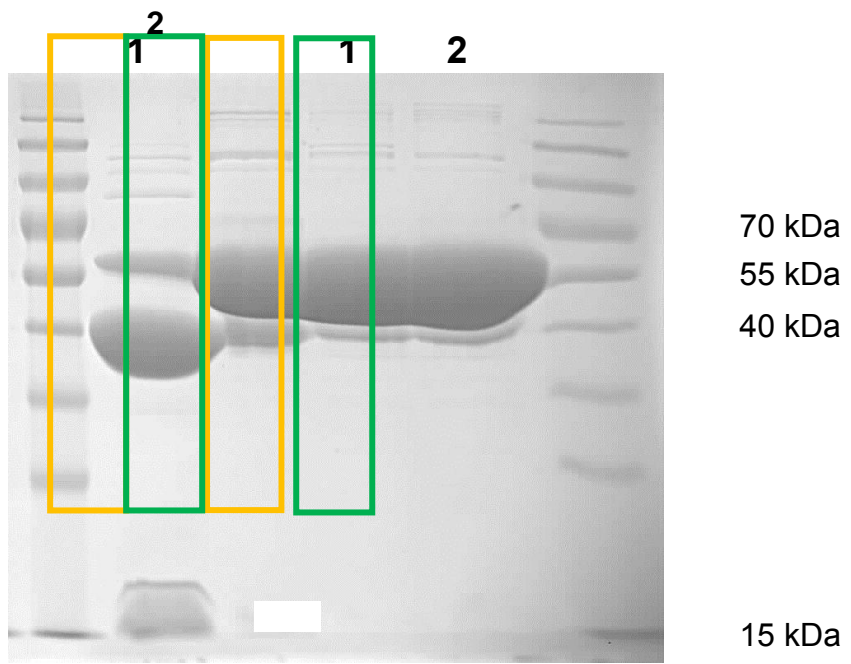

SDS-PAGE (12%acrylamide)

1: 0.1mM NP seul

2: 0.1mM NP+0.5mM

6 **B**

1 Monomeric NP labeled with a His-tag at its C terminal was purified as detailed in Materials and  
2 Methods. A: A freshly purified NP (10 $\mu$ M) sample or kept for a month at 4°C was run on a SDS-  
3 PAGE. The corresponding western blot using an anti-His antibody is shown on the right side. B:  
4 A similar experiment was performed with 100  $\mu$ M NP alone (lanes 1) or 100  $\mu$ M NP + 500  $\mu$ M  
5 naproxen (lanes 2). When kept at room temperature, the cleavage of NP C-terminal is impeded  
6 by the presence of naproxen.

7

Supplementary Figure 4:

1  
2  
3  
4  
5  
6  
7  
8  
9  
10  
11  
12  
13  
14

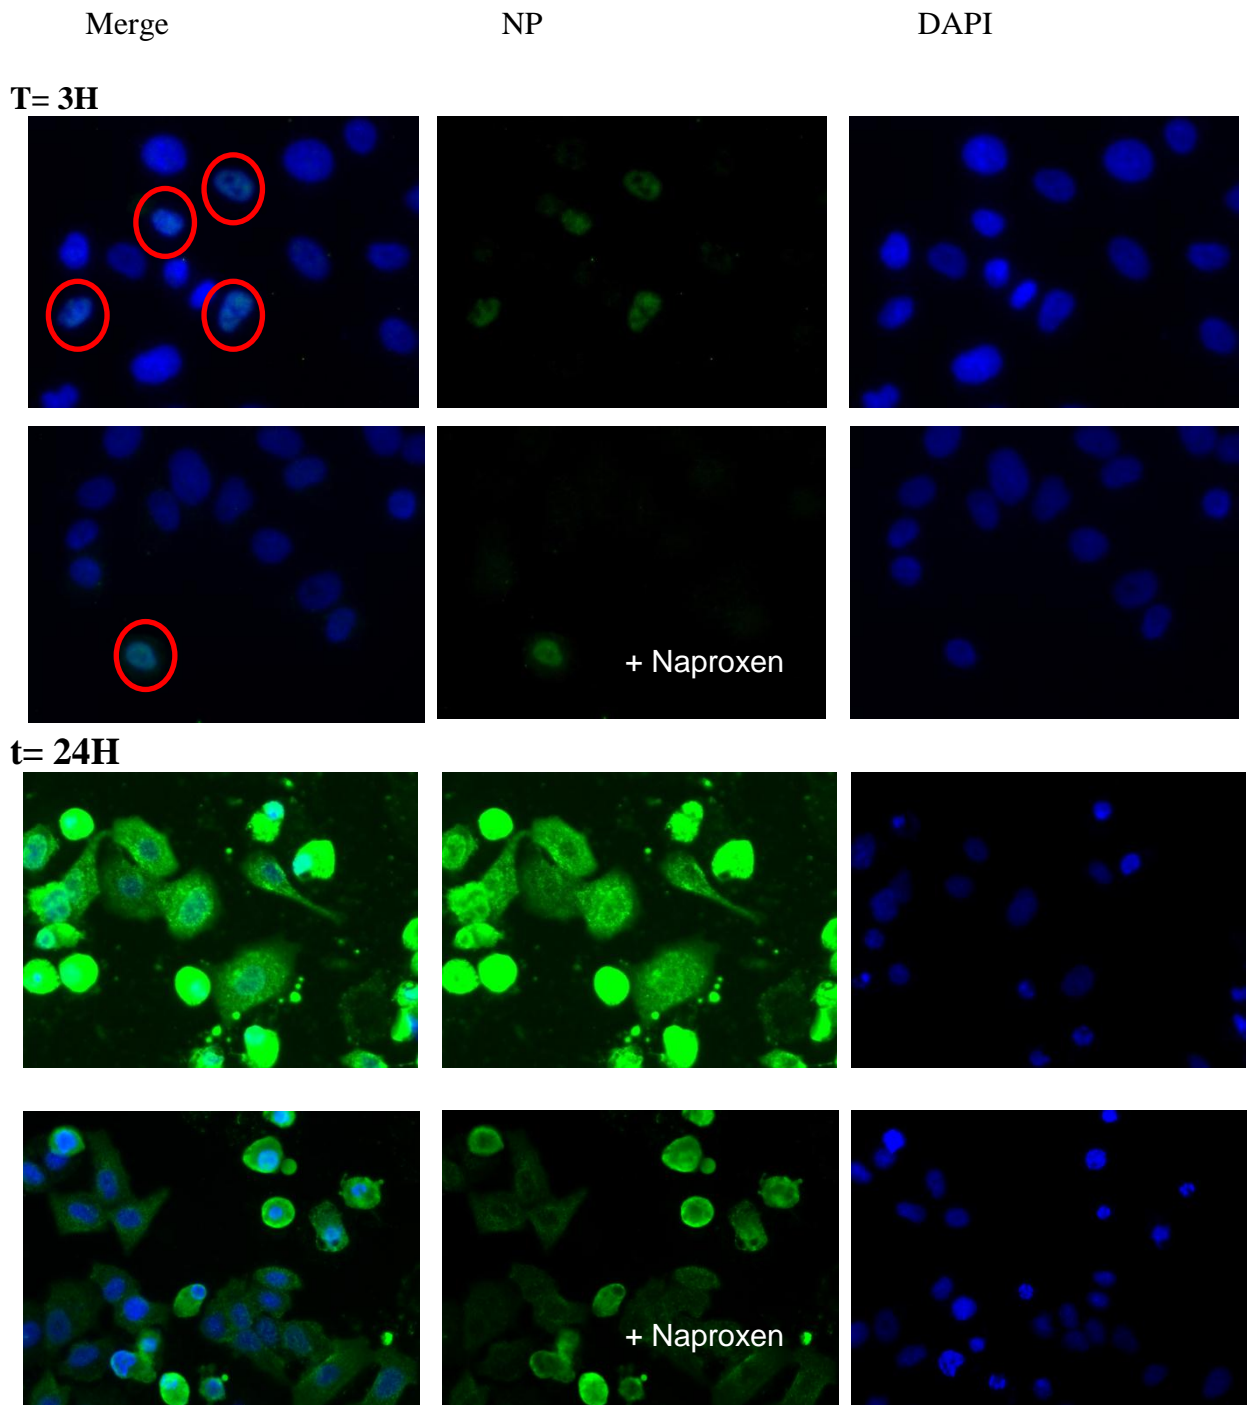

Immuno-fluorescence (IF) of A549 cells infected with Influenza A/WSN/3 stained with DAPI (nucleus, blue) and with a monoclonal anti-NP antibody (green) at t = 3H post-infection. The data show no change in the nuclear localization of NP upon addition of naproxen (50  $\mu$ M).

Supplementary Figure 5: In vivo protocols

2000pfu:

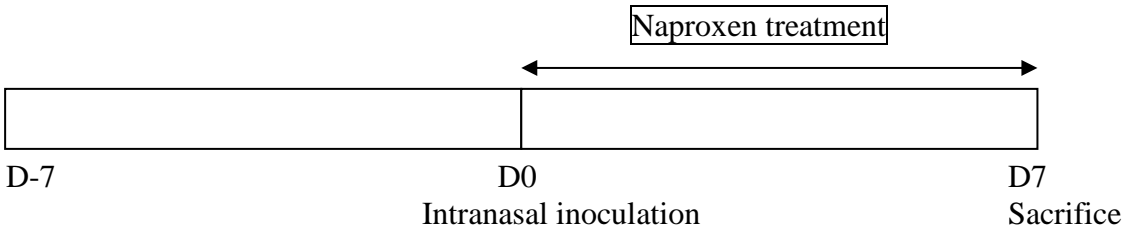

50 pfu:

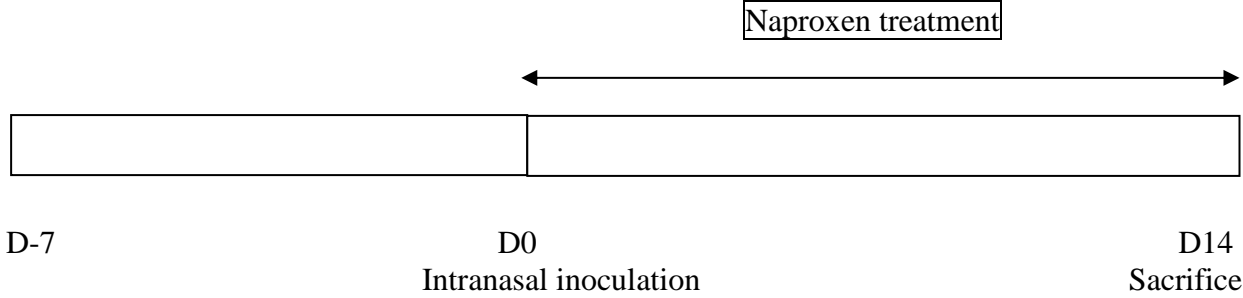



1 **Supplementary Figure 6:** Comparison of the broncho-alveolar fluid of infected (A),  
2 infected and treated with 3 mg naproxen (B) and non infected mice (C)

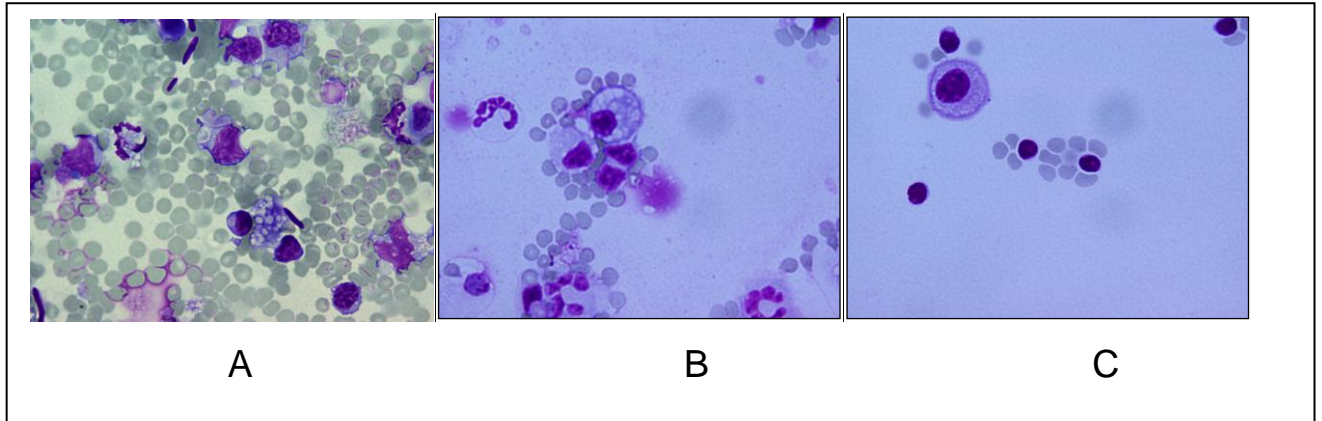

11 To collect broncho-alveolar lavage fluids (BAL), the mouse trachea was surgically exposed,  
12 cannulated with a syringe and the remaining lobes of the lungs were flushed four times in and  
13 out using 1.5 mL D-PBS (Gibco) supplemented with 1mM EDTA (Gibco). After centrifugation  
14 (4 min, 500g), viable BAL cells were resuspended at appropriate concentration for  
15 cytocentrifugation. BAL supernatants were stored frozen at  $-20^{\circ}\text{C}$ . Microscopic examination of  
16 representative May-Grünwald and Giemsa stained cytocentrifuge slides are shown below.

17 In A, many red blood cells and a reduced number of macrophages in infected and untreated mice  
18 attested at bleeding and inflammation of the lungs; in the healthy control C, only macrophage  
19 and monocytes are observed; in infected mice with naproxen treatment (B, 3mg/ day), only a few  
20 red blood cells are seen and the macrophages are activated and overall the number of cells is  
21 reduced as compared to A.

22  
23
